# Supplementary material for: Quantifying the Association Between Physical Activity and Cardiovascular Disease and Diabetes: A Systematic Review and Meta‐Analysis
Source: PubMed Central journal article supplement — J Am Heart Assoc. 2016 Sep 14;5(9):e002495. doi: 10.1161/JAHA.115.002495 (PMC5079002; doi:10.1161/jaha.115.002495), 2016-09-14
Supplement: JAH3-5-e002495-s001.pdf [file JAH3-5-e002495-s001.pdf]

# **SUPPLEMENTAL MATERIAL**

**Table S1. Criteria for assessment of bias / study quality**

| <b>1st Author</b>    | <b>Year</b> | <b>Representativeness of cohort</b> | <b>Selection of non-exposed</b> | <b>Measurement of body weight</b> | <b>Measurement of physical activity</b> | <b>Response rate</b> | <b>Loss to follow-up</b> | <b>Reverse causality</b> | <b>Measurement of health outcomes</b> | <b>Quality score</b> |
|----------------------|-------------|-------------------------------------|---------------------------------|-----------------------------------|-----------------------------------------|----------------------|--------------------------|--------------------------|---------------------------------------|----------------------|
| Sherman(1)           | 1994        | 1                                   | 1                               | 1                                 | 0                                       | 0                    | 1                        | 1                        | 1                                     | 6                    |
| Sesso(2)             | 1999        | 1                                   | 1                               | 0                                 | 1                                       | 1                    | 0                        | 1                        | 0                                     | 5                    |
| Hu(3)                | 2000        | 1                                   | 1                               | 0                                 | 0                                       | 0                    | 1                        | 1                        | 1                                     | 5                    |
| Sesso(4)             | 2000        | 1                                   | 1                               | 0                                 | 0                                       | 0                    | 1                        | 1                        | 0                                     | 4                    |
| Gregg(5)             | 2003        | 1                                   | 1                               | 1                                 | 1                                       | 0                    | 1                        | 1                        | 0                                     | 6                    |
| Hu (NHS)(6)          | 2004        | 1                                   | 1                               | 0                                 | 0                                       | 0                    | 1                        | 1                        | 1                                     | 5                    |
| Hu (Finnish pop)(7)  | 2004        | 0                                   | 1                               | 0                                 | 1                                       | 0                    | 1                        | 1                        | 1                                     | 5                    |
| Franco(8)            | 2005        | 1                                   | 1                               | 1                                 | 0                                       | 0                    | 1                        | 1                        | 0                                     | 5                    |
| Myint(9)             | 2006        | 1                                   | 1                               | 1                                 | 1                                       | 0                    | 1                        | 1                        | 1                                     | 7                    |
| Hu(10)               | 2007        | 0                                   | 1                               | 0                                 | 1                                       | 0                    | 1                        | 1                        | 1                                     | 5                    |
| Hu(11)               | 2010        | 1                                   | 0                               | 1                                 | 0                                       | 1                    | 0                        | 1                        | 1                                     | 5                    |
| Eguchi (12)          | 2012        | 1                                   | 1                               | 1                                 | 0                                       | 0                    | 0                        | 1                        | 1                                     | 5                    |
| Odegaard(13)         | 2011        | 1                                   | 1                               | 1                                 | 1                                       | 0                    | 1                        | 1                        | 1                                     | 7                    |
| Petersen(14)         | 2012        | 1                                   | 1                               | 1                                 | 1                                       | 0                    | 1                        | 1                        | 1                                     | 7                    |
| Reis(15)             | 2011        | 1                                   | 1                               | 1                                 | 0                                       | 0                    | 0                        | 1                        | 0                                     | 4                    |
| Shi(16)              | 2013        | 1                                   | 1                               | 1                                 | 1                                       | 1                    | 0                        | 1                        | 1                                     | 7                    |
| Baceviciene(17)      | 2012        | 1                                   | 1                               | 1                                 | 1                                       | 1                    | 0                        | 0                        | 1                                     | 6                    |
| Clays(18)            | 2012        | 1                                   | 1                               | 1                                 | 1                                       | 0                    | 0                        | 1                        | 1                                     | 6                    |
| Holtermann(19)       | 2012        | 1                                   | 1                               | 1                                 | 1                                       | 1                    | 0                        | 1                        | 1                                     | 7                    |
| Jefferis(20)         | 2012        | 1                                   | 1                               | 1                                 | 1                                       | 1                    | 0                        | 1                        | 1                                     | 7                    |
| Kraigher-Krainer(21) | 2013        | 1                                   | 1                               | 0                                 | 1                                       | 0                    | 1                        | 1                        | 1                                     | 6                    |
| Park(22)             | 2012        | 1                                   | 1                               | 1                                 | 1                                       | 0                    | 0                        | 0                        | 1                                     | 5                    |
| Chomistek(23)        | 2013        | 1                                   | 1                               | 0                                 | 1                                       | 0                    | 0                        | 1                        | 1                                     | 5                    |
| Gunnell(24)          | 2013        | 1                                   | 1                               | 1                                 | 1                                       | 0                    | 0                        | 1                        | 1                                     | 6                    |
| Holtermann(25)       | 2013        | 1                                   | 1                               | 1                                 | 1                                       | 1                    | 0                        | 1                        | 1                                     | 7                    |
| Jefferis(26)         | 2013        | 1                                   | 1                               | 1                                 | 1                                       | 1                    | 0                        | 1                        | 1                                     | 7                    |
| Kim(27)              | 2013        | 1                                   | 1                               | 1                                 | 1                                       | 0                    | 0                        | 1                        | 1                                     | 6                    |
| McDonnell(28)        | 2013        | 0                                   | 1                               | 1                                 | 1                                       | 1                    | 0                        | 1                        | 1                                     | 6                    |
| Patel(29)            | 2013        | 1                                   | 1                               | 1                                 | 1                                       | 1                    | 0                        | 1                        | 0                                     | 6                    |
| Soedamah(30)         | 2013        | 1                                   | 1                               | 0                                 | 0                                       | 0                    | 0                        | 1                        | 1                                     | 4                    |
| Vergnaud(31)         | 2013        | 1                                   | 1                               | 1                                 | 1                                       | 1                    | 0                        | 1                        | 1                                     | 7                    |
| Wang(32)             | 2013        | 1                                   | 1                               | 1                                 | 1                                       | 1                    | 0                        | 1                        | 1                                     | 7                    |
| Williams(16)         | 2013        | 1                                   | 0                               | 1                                 | 1                                       | 0                    | 1                        | 1                        | 1                                     | 6                    |
| Zhang, Q(29)         | 2013        | 1                                   | 1                               | 1                                 | 0                                       | 1                    | 0                        | 1                        | 1                                     | 6                    |
| Zhang, Y(29)         | 2013        | 1                                   | 1                               | 1                                 | 1                                       | 1                    | 0                        | 1                        | 1                                     | 7                    |
| Young(33)            | 2014        | 1                                   | 1                               | 1                                 | 1                                       | 0                    | 0                        | 1                        | 1                                     | 6                    |

- *Representativeness of cohort (0 = no description or selected group of users (e.g. nurses), 1 = otherwise)*
- *Selection of non-exposed (0 = no description or drawn from different source than exposed, 1 = otherwise)*
- *Measurement of body weight (0 = no description or self report, 1 = otherwise)*
- *Measurement of physical activity (0 = no description or non-validated self report, 1 = otherwise)*
- *Response rate (0 = no description or less than 60%, 1 = otherwise)*
- *Loss to follow-up (0 = no description or greater than 5%, 1 = otherwise)*
- *Reverse causality (0 = no description or included participants with health outcome at baseline, 1 = otherwise)*
- *Measurement of health outcome (0 = no description or incidence measured by self report of doctor diagnosis, 1 = otherwise)*

**Table S2. Converting physical activity measures to a standardised metric of ‘Additional METh/d’**

The single metric that we converted all the measures from the identified papers to was ‘Additional MET hours per day’ (or ‘Additional METh/d’). This measure is a comparative measure, where the baseline group in each paper is arbitrarily assigned the value of zero and the extra physical activity in the other exposure groups is estimated as the amount of time spent in physical activity multiplied by the intensity of the physical activity, measured in METs (or ‘metabolic equivalents’). METs are a standard measure used in physical activity research, which are an estimate of the intensity of physical activity compared to a baseline of 1 MET which is the intensity of sitting quietly. A standard compendium of MET values for many different activities can be found on the Compendium of Physical Activities Google Site.(34)

In order to develop the ‘Additional METh/d’ metric, it is necessary to estimate the METh/d for all of the reported physical activities described in each paper for each of the exposure groups, and then subtract the baseline METh/d from each of the groups. There were a number of standard rules that we applied for each paper, to remove subjectivity from the process. These rules were as follows:

1. When a paper uses a range to describe an exposure (e.g. 0-2 h/week walking) we used a point estimate which was the mid-point of the range.
2. When a paper uses an open category to describe an exposure we assume that the size of this category is the same as the closest equivalent exposure category and then calculate the median. For example, if a paper categorised walking as 0-2h/week; 2-4h/week; 4+ h/week, then we assume that the last exposure group is 4-6h/week and use the median value of 5h/week.
3. When physical activity is measured in ‘occasions’ or ‘sessions’ but no time is estimated, we assume that each occasion or session is half an hour.
4. When a paper describes physical activity in terms of intensity (rather than describing the actual activity that was performed) then we assume the following MET values: light intensity: 2.5 METs; moderate intensity: 4.5 METs; vigorous intensity: 6.5 METs. Ambiguous activities are assigned to either light, moderate or vigorous intensity levels – for example, ‘exercise’ or ‘sport’ are both categorised as vigorous.
5. Where the paper tries to measure amount of time spent in ‘moderate or vigorous’ physical activity but gives no information about the type of activity, we assume a MET value of 5.5.
6. Often papers categorised groups using an ‘or’ function. For example, an exposure group may consist of individuals who walk for at least 5 hours per week or exercise for at least two hours per week. In these instances, we assumed that any combination of these two activities is equally likely. So we calculated the METh/d for someone who only walks 5 hours per week, for someone who only exercises for two hours a week, and for someone who both walks for five hours a week AND exercises for two hours a week. We then calculated the average of the three measures, and assigned that value to the exposure group.
7. When a paper split groups into x-tiles of an exposure variable and provided estimates of mean and standard deviation of the exposure variable in the whole sample, we assumed that the exposure variable was log-normally distributed (unless otherwise stated in the paper) and then calculate the exposure variable for each of the x-tile variables from this assumed distribution.

**Table S3. Identified studies evaluating the effect of physical activity on CVD outcome and Type II Diabetes Incidence with adjustment for body weight**

| 1st Author (year)      | Cohort name | Domains of PA measured                                        | Disease outcome  | Disease ascertainment                                      | Population                   | Sample size | Number of events | Follow-up (years) | Adjustments                                                                                                                                                        |
|------------------------|-------------|---------------------------------------------------------------|------------------|------------------------------------------------------------|------------------------------|-------------|------------------|-------------------|--------------------------------------------------------------------------------------------------------------------------------------------------------------------|
| Baceviciene (2012)(17) | MONICA      | Recreational;<br>Active Travel;<br>Household                  | CVD mortality    | National Death Register                                    | Lithuanian adults aged 25-64 | 2,643       | 150              | 12.6              | Age, sex, education, study year, smoking, alcohol, BMI, hypertension, cholesterol, glucose, CHD, stroke                                                            |
| Chomistek (2013)(23)   | WHI         | Recreational;<br>Active Travel                                | CHD incidence    | Questionnaire & medical records, adjudicated by physicians | US women aged 50-79          | 71,018      | 2,411            | 12.2              | Age, sedentary time, race, education, income, marital status, smoking, history of MI, depression, alcohol, sleep, total calories, saturated fat & fibre, BMI       |
|                        |             |                                                               | Stroke incidence |                                                            |                              |             | 2,050            |                   |                                                                                                                                                                    |
|                        |             |                                                               | CVD incidence    |                                                            |                              |             | 4,235            |                   |                                                                                                                                                                    |
| Clays (2012)(18)       | Belstress   | Recreational;<br>Occupational                                 | CHD incidence    | Not reported                                               | Belgian adults aged 35-59    | 14,337      | 87               | 3.15              | Age, educational level, occupational class, job strain, BMI, smoking, alcohol, diabetes, SBP, cholesterol, HDL,                                                    |
| Eguchi (2012) (12)     | JAAC        | Recreational;<br>Active Travel                                | CVD mortality    | Death Certificates                                         | Japanese men aged 40-79      | 18,747      | 441              | 16.5              | Age, hx of hypertension, hx of diabetes, education, employment, mental stress, seven health behaviours (fruit, fish, milk, exercise, BMI, ethanol, sleep, smoking) |
|                        |             |                                                               |                  |                                                            | Japanese women aged 40-79    | 24,263      | 408              |                   |                                                                                                                                                                    |
| Franco (2005)(8)       | Framingham  | Recreational;<br>Active Travel;<br>Household;<br>Occupational | CVD incidence    | Physician evaluation of diagnosis                          | US adults aged 28-62,        | 9,033       | 1,573            | 12.0              | Age, sex, smoking, BMI, hypertension, co-morbidities                                                                                                               |

| 1st Author (year)     | Cohort name                 | Domains of PA measured                | Disease outcome       | Disease ascertainment            | Population                 | Sample size | Number of events | Follow-up (years) | Adjustments                                                                                                                       |
|-----------------------|-----------------------------|---------------------------------------|-----------------------|----------------------------------|----------------------------|-------------|------------------|-------------------|-----------------------------------------------------------------------------------------------------------------------------------|
| Gregg (2003)(5)       | SOF                         | Walking; leisure activities; sports   | CVD mortality         | Death certificates               | US women aged >65          | 9,518       | 826              | 10.6              | Age, smoking, BMI, co-morbidities                                                                                                 |
| Gunnell (2013)(24)    | HWSS                        | Recreational; Active Travel           | IHD disease incidence | Hospital records                 | Australian adults aged >45 | 14,890      | 538              | 3                 | Age, sex, smoking, charlson index, LTPA, sedentary activity level, BMI, fruit & veg intake, survey year, diabetes hospitalisation |
| Holtermann (2012)(19) | Copenhagen City Heart Study | Recreational; Household               | IHD mortality         | Death registry                   | Danish men aged 40-59      | 5,249       | 579              | 30                | Age, clinical factors (BMI, BP)                                                                                                   |
| Holtermann (2013)(25) | Copenhagen City Heart Study | Recreational; Occupational            | CVD mortality         | National Death Register          | Danish men aged 25-66      | 7,411       | 1,945            | 22.4              | Age, smoking, alcohol, cholesterol, SBP, blood pressure meds, diabetes, household income, BMI                                     |
|                       |                             |                                       |                       |                                  | Danish women aged 25-66    | 8,916       | 1,814            | 22.4              |                                                                                                                                   |
| Hu (2000)(3)          | Nurses Health Study         | Walking; vigorous exercise activities | Stroke incidence      | Self-report and health screening | US women aged 40-65        | 72,488      | 407              | 8.0               | Age, smoking, BMI, alcohol, menopausal status, parental history of CHD, aspirin use, co-morbidities                               |
| Hu (2004)(6)          | Nurses Health Study         | Walking; leisure activities           | CVD mortality         | Death certificates               | US women aged 30-55        | 116,564     | 2,370            | 24.0              | Age, BMI, smoking, alcohol, parental history of CHD, menopausal status, hormone use                                               |
| Hu (2004)(7)          | Finland population          | Occupational PA; leisure activities   | CVD incidence         | Routine update from registry     | Finnish adults aged 25-64  | 18,892      | 818              | 9.8               | Age, education, alcohol, smoking, BMI, SBP, cholesterol, co-morbidities                                                           |

| 1st Author (year)           | Cohort name             | Domains of PA measured                               | Disease outcome            | Disease ascertainment                                                                         | Population                | Sample size | Number of events | Follow-up (years) | Adjustments                                                                                                               |
|-----------------------------|-------------------------|------------------------------------------------------|----------------------------|-----------------------------------------------------------------------------------------------|---------------------------|-------------|------------------|-------------------|---------------------------------------------------------------------------------------------------------------------------|
| Hu (2007)(10)               | Finland population      | Occupational PA; active travel; leisure activities   | CHD incidence              | Routine update from registry                                                                  | Finnish adults aged 25-64 | 47,840      | 4,660            | 18.9              | Age, education, alcohol, smoking, BMI, SBP, cholesterol, diabetes                                                         |
| Hu (2010)(11)               | Finland population      | Occupational PA; active travel; leisure activities   | Heart Failure incidence    | Routine update from registry                                                                  | Finnish adults aged 25-74 | 59,178      | 3,614            | 18.4              | Age, education, alcohol, smoking, BMI, SBP, cholesterol, co-morbidities                                                   |
| Jefferis (2012)(20)         | BRHS                    | Recreational; Active Travel; Household               | Type II Diabetes incidence | Self report, then correspondence with primary care NHS central registers & death certificates | UK men aged 60-79         | 2,675       | 113              | 7.1               | Age, region, social class, smoking, alcohol, coffee, total kcal/day, dietary intake, cholesterol. BMI                     |
| Jefferis (2013)(35)         | BRHS                    | Recreational; Household; Active Travel               | Stroke incidence           | Mortality microdata by National stats office                                                  | UK men aged 40-59         | 3,435       | 195              | 10.9              | Age, region, alcohol, smoking, social class, cholesterol, SBP, BMI, AF, LVH                                               |
| Kim (2013)(27)              | Seoul Male Cohort Study | Recreational; Active Travel; Household; Occupational | CVD mortality              | Review of medical records & adjudicated by physician panel                                    | Korean adults aged 40-59  | 12,538      | 171              | 19                | Age, educational attainment, alcohol, sleep, FHx of CVD, smoking, BMI, health score, cholesterol, blood pressure, glucose |
| Kraigher-Krainer (2013)(21) | Framingham              | Recreational; Occupational                           | Heart Failure Incidence    |                                                                                               | US adults aged 30-62      | 1,142       | 250              | 10                | Age, sex, SBP, Hypertension, diabetes, valve disease, alcohol, LV hypertrophy, BMI                                        |

| 1st Author (year)    | Cohort name                    | Domains of PA measured                               | Disease outcome                                                   | Disease ascertainment                                      | Population                | Sample size | Number of events        | Follow-up (years) | Adjustments                                                                                                                                                      |
|----------------------|--------------------------------|------------------------------------------------------|-------------------------------------------------------------------|------------------------------------------------------------|---------------------------|-------------|-------------------------|-------------------|------------------------------------------------------------------------------------------------------------------------------------------------------------------|
| McDonnell (2013)(28) | REGARDS                        | Recreational; Occupational; Active Travel            | Stroke incidence                                                  | Patients, medical records and adjudication by 2 physicians | US adults aged >45        | 27,348      | 918                     | 5.7               | Age, sex, race, age-race interaction, socioeconomic factors, diabetes, hypertension, BMI, alcohol, smoking                                                       |
| Myint (2006)(9)      | EPIC - Norfolk                 | Occupational PA; leisure activities                  | Stroke incidence                                                  | Routine update from registry                               | UK adults aged 40-79      | 20,040      | 361                     | 8.6               | Age, sex, BMI, SBP, cholesterol, smoking, alcohol, diabetes                                                                                                      |
| Odegaard (2011)(13)  | Singapore Chinese Health Study | Recreational; Active Travel                          | CVD mortality                                                     | Registries                                                 | Chinese adults aged 45-74 | 44,056      | 1,971                   | 13                | Factors simultaneously (BMI, Alcohol, Smoking, Diet, sleep), Age, sex, dialect, age enrolled, education, diabetes, FHx of Colorectal Ca, energy intake           |
| Park (2012)(22)      | KEPEC                          | Recreational; Household                              | CVD mortality                                                     | Death Certificates                                         | Korean women aged >65     | 5,079       | 607                     | 8                 | Age, self-reported health, self-reported limitation in activity, smoking status, drinking status, body mass index, religion and other types of physical activity |
| Patel (2013)(29)     | CHS                            | Recreational; Occupational; Household; Active Travel | Heart Failure incidence<br>Acute MI incidence<br>Stroke incidence | Adjudicated by CHS Events committee                        | US adults aged >65        | 5,503       | 1,037<br>5,061<br>5,290 | 13                | Age, sex, race, education, income, alcohol, smoking, BMI, Coronary artery disease, MI, Hypertension, T2DM, Stroke,                                               |



| 1st Author (year)   | Cohort name                 | Domains of PA measured                               | Disease outcome  | Disease ascertainment           | Population              | Sample size | Number of events | Follow-up (years) | Adjustments                                                                                          |
|---------------------|-----------------------------|------------------------------------------------------|------------------|---------------------------------|-------------------------|-------------|------------------|-------------------|------------------------------------------------------------------------------------------------------|
|                     |                             |                                                      | CVD mortality    |                                 |                         |             | 877              |                   |                                                                                                      |
| Petersen (2012)(14) | Copenhagen City Heart Study | Recreational; Active Travel                          | CHD incidence    | National patient register       | Danish men aged 20-93   | 4,487       | 1431             | 13                | Age, education, smoking habits, alcohol, BMI, diabetes, cholesterol, blood pressure lowering therapy |
|                     |                             |                                                      | MI incidence     |                                 |                         |             | 795              |                   |                                                                                                      |
|                     |                             |                                                      | CHD incidence    |                                 | Danish women aged 20-93 | 5,956       | 1,393            |                   |                                                                                                      |
|                     |                             |                                                      | MI incidence     |                                 |                         |             | 589              |                   |                                                                                                      |
| Reis (2011)(15)     | NIH-AARP                    | Occupational; Household                              | Type II Diabetes | Self-report                     | US men aged 50-71       | 114,996     | 11,031           | 10                | Age, Race, educational attainment, marital status, BMI, diet, Alcohol, smoking                       |
|                     |                             |                                                      |                  |                                 | US women aged 50-71     |             | 92,483           |                   |                                                                                                      |
| Sesso (1999)(2)     | CAHS                        | Walking; stair climbing; sports                      | CVD incidence    | Self-report of doctor diagnosis | US women, 37-69         | 1,564       | 181              | 31                | Age, BMI, SBP, smoking, family history of CHD, diabetes                                              |
| Sesso (2000)(4)     | Harvard college alumni      | Walking; stair climbing; sports; leisure activities  | CHD incidence    | Self-report of doctor diagnosis | US adults aged 39-88    | 12,516      | 2,135            | 16.0              | Age, BMI, smoking, alcohol, hypertension, diabetes, early parental death                             |
| Sherman (1994)(1)   | Framingham                  | Recreational; Active Travel; Household; Occupational | CVD mortality    | Death certificates              | US adults >75           | 285         | 81               | 10.0              | Age, SBP, cholesterol, smoking, weight, glucose intolerance, co-morbidities                          |

| 1st Author (year)   | Cohort name                                          | Domains of PA measured                                        | Disease outcome                                        | Disease ascertainment                                             | Population                                     | Sample size | Number of events | Follow-up (years) | Adjustments                                                                                                                                                                                     |
|---------------------|------------------------------------------------------|---------------------------------------------------------------|--------------------------------------------------------|-------------------------------------------------------------------|------------------------------------------------|-------------|------------------|-------------------|-------------------------------------------------------------------------------------------------------------------------------------------------------------------------------------------------|
| Shi (2013)(36)      | SMHS                                                 | Recreational;<br>Active Travel                                | Type II Diabetes                                       | Follow-up surveys and checking if conforms to American guidelines | Chinese adults aged 40-64                      | 51,464      | 1,304            | 5.4               | Age, Energy intake, Smoking, Alcohol, education level, occupation, income level, hypertension, family history of diabetes, BMI, WHR                                                             |
| Soedamah (2013)(30) | Health Survey for England and Scottish Health Survey | Recreational;<br>Household;<br>Active Travel                  | CVD mortality                                          | Patient-based database of deaths                                  | UK adults aged >40                             | 17,410      | 638              | 9.7               | Age, Marital status, Social Class, Ethnicity, Education, Survey year, cigarette smoking status, longstanding illness, BMI, domestic activity and alcohol                                        |
| Vergnaud (2013)(31) | EPIC                                                 | Recreational;<br>Occupational;<br>Household;<br>Active Travel | CVD Mortality                                          | Board of health & death indexes                                   | Europeans Aged 25-70                           | 378,864     | 23,828           | 12.8              | Sex, Age, Centre, Educational level, smoking, menopause, body fatness, calorific foods, plant foods, animal foods, alcohol & breastfeeding                                                      |
| Wang (2013)(32)     | SMHS                                                 | Recreational;<br>Occupational;<br>Household;<br>Active Travel | CVD mortality                                          | National patient register                                         | Chinese men 40-74                              | 61,477      | 1,181            | 5.48              | Age, Educational level, Income, Occupation, alcohol, pack-years of smoking, energy intake, red meat, fruit, daily PA other than exercise, BMI, Hx of CVD, Diabetes, Hypertension, Liver disease |
| Williams (2013)(16) | NWHS                                                 | Recreational;<br>Active Travel;<br>Household;<br>Occupational | CVD mortality<br><br>Ischaemic Heart disease incidence | National death index                                              | US walking magazine subscribers (ages unknown) | 42,022      | 834<br><br>443   | 9.6               | Age, race, sex, education, prior heart attack, aspirin use, intake of meat, fruit, alcohol, BMI and medication use                                                                              |

| 1st Author (year)   | Cohort name                   | Domains of PA measured                                        | Disease outcome                                     | Disease ascertainment                                          | Population                                  | Sample size | Number of events | Follow-up (years) | Adjustments                                                                                                                                                          |
|---------------------|-------------------------------|---------------------------------------------------------------|-----------------------------------------------------|----------------------------------------------------------------|---------------------------------------------|-------------|------------------|-------------------|----------------------------------------------------------------------------------------------------------------------------------------------------------------------|
| Young (2014)(33)    | California Men's Health Study | Recreational;<br>Active Travel;<br>Household;<br>Occupational | Heart Failure Incidence                             | National patient register                                      | US men aged 45-69                           | 82,695      | 3,473            | 7.8               | Age, race/ethnicity, education, income, BMI, smoking, hypertension, diabetes, anti-hypertensives, HDL, glucose, triglycerides, food intake, alcohol                  |
| Zhang, Q (2013)(29) | Kailuan                       | Recreational;<br>Occupational;<br>Household;<br>Active Travel | Stroke incidence: total, ischaemic and haemorrhagic | 2 yearly physician interviews and checking hospital discharges | Chinese adults aged 19-98                   | 91698       | 1,486            | 4                 | Smoking, BMI, Diet, Cholesterol, Blood pressure, Glucose, Age, Sex, Hospital, Education, Income                                                                      |
| Zhang, Y (2011)(37) | MONICA                        | Recreational;<br>Occupational                                 | Stroke incidence: total, ischaemic and haemorrhagic | Computer registry                                              | Finnish adults<br>Finnish adults aged 25-74 | 36,686      | 1,478            | 13.7              | Age, Study year, sex, smoking, physical activity, vegetable consumption, fruit consumption, education, alcohol, FHx of Stroke, Hx of Diabetes, BMI, SBP, Cholesterol |

AF – Atrial Fibrillation; BMI – Body Mass Index; BP – Blood pressure; BRHS – British Regional Heart Study; CAH - College Alumni Health Study; CHS – Cardiovascular Health Study; CHD – Coronary Heart Disease; CVD Cardiovascular disease; EPIC – European Prospective Investigation of Cancer; FHx – family history; HWSS – Health and Wellbeing Surveillance System; Hx – history; JAAC - Japan Collaborative Cohort Study; JPHC – Japan Public Health Center based prospective study; KEPEC – Korean Elderly Pharmacoepidemiologic Cohort; LTA - Leisure Time Physical Activity; LVH – Left Ventricular hypertrophy; MI – Myocardial Infarction; Monica – the WHO Multinational Monitoring of Trends and Determinants of Cardiovascular Disease; NHANES – National Health and Nutrition Examination Survey; NHS – National Health Service; NHS – Nurses' Health Study; NIH-AARP – National Institute of Health – American Association of Retired Persons; NWHS - National Walker's Health Study; PA – physical activity; REGARDS – Reasons for Geographic Differences in Stroke; SBP – Systolic Blood Pressure; SMHS - Shanghai Men's Health Study; SOF – Study of Osteoporotic Fractures; SOF – Study of Osteoporotic Fractures; T2DM Type II Diabetes Mellitus; US – United States; VTE – Venous thromboembolism; WHI – Women's Health Initiative; CHS – Cardiovascular Health Study; WHR - Waist-to-hip ratio

**Table S4. Excluded studies and data points evaluating the effect of physical activity on CVD outcome and Type II Diabetes Incidence.**

**Note these studies have been excluded as only one data point for the disease outcome was found, therefore it was decided not to include in a meta-analysis**

| 1st Author (year)     | Cohort name | Domains of PA measured                               | Disease outcome                   | Disease ascertainment                          | Population                   | Sample size | Number of events | Follow-up (years) | Adjustments                                                                                                                             |
|-----------------------|-------------|------------------------------------------------------|-----------------------------------|------------------------------------------------|------------------------------|-------------|------------------|-------------------|-----------------------------------------------------------------------------------------------------------------------------------------|
| Patel (2013)(29)      | CHS         | Recreational, Occupational, Household, Active Travel | Angina incidence                  | Adjudicated by CHS Events committee            | Age >65                      | 5,503       | 4708             | 13                | Age, sex, race, education, income, alcohol, smoking, BMI, Coronary artery disease, Myocardial infarction, Hypertension, T2DM and Stroke |
| Williams (2013)(16)   | NWHs        | Recreational, Active Travel, Household, Occupational | Cerebrovascular disease mortality | National death index                           | Walking magazine subscribers | 42,022      | 147              | 9.6               | Age, race, sex, education, prior heart attack, aspirin use, intake of meat, fruit, alcohol, BMI and medication use                      |
|                       |             |                                                      | Heart Failure mortality           |                                                |                              |             | 53               |                   |                                                                                                                                         |
|                       |             |                                                      | Diabetes mortality                |                                                |                              |             | 48               |                   |                                                                                                                                         |
| Wattanakit (2012)(38) | ARIC        | Recreational, occupational                           | Venous thromboembolism incidence  | Telephoning patients & hospital discharge list | Adults aged 45-64            | 15340       | 468              | 15.5              | BMI, age, race, field centre, and sex                                                                                                   |

ARIC – Atherosclerosis Risk in Communities Study; BMI – Body Mass Index; CHS – Cardiovascular Health Study; NWHs - National Walker's Health Study.

**Table S5. Sensitivity analyses: results restricted to studies that achieved at least six of the eight study criteria; studies with implausible PA values removed. Meta-analyses adjusted for body weight for 11.25 METhr/week increase in PA, with a 0.25 power transformation**

| Condition (ICD-10 code)                  | <i>High quality studies only</i> |                | <i>Implausible PA ranges removed</i> |                | <i>Main results (for comparison)</i> |                |
|------------------------------------------|----------------------------------|----------------|--------------------------------------|----------------|--------------------------------------|----------------|
|                                          | RR (95% CI)                      | I <sup>2</sup> | RR (95% CI)                          | I <sup>2</sup> | RR (95% CI)                          | I <sup>2</sup> |
| CVD incidence (I00-I99)                  | <i>n/a</i>                       |                | 0.83 (0.77, 0.89)                    | 0.0%           | 0.83 (0.77, 0.89)                    | 0.0%           |
| CVD mortality (I00-I99)                  | 0.81 (0.76, 0.86)                | 25.1%          | 0.76 (0.69, 0.84)                    | 78.2%          | 0.77 (0.71, 0.84)                    | 73.6%          |
| Stroke incidence (I60-I69)               | 0.81 (0.75, 0.87)                | 0.0%           | 0.82 (0.77, 0.87)                    | 0.0%           | 0.82 (0.77, 0.87)                    | 0.0%           |
| CHD incidence (I20-I25)                  | 0.76 (0.67, 0.86)                | 0.0%           | 0.79 (0.74, 0.86)                    | 0.0%           | 0.80 (0.75, 0.86)                    | 0.0%           |
| CHD mortality (I20-25)                   | 0.80 (0.58, 1.09)                | 59.1%          | 0.80 (0.58, 1.09)                    | 59.1%          | 0.80 (0.58, 1.09)                    | 59.1%          |
| Heart failure incidence (I50)            | 0.79 (0.73, 0.85)                | 0.0%           | 0.80 (0.75, 0.86)                    | 4.0%           | 0.81 (0.76, 0.86)                    | 0.0%           |
| Myocardial infarction incidence (I21-22) | 0.75 (0.62, 0.89)                | 0.0%           | 0.75 (0.62, 0.89)                    | 0.0%           | 0.75 (0.62, 0.89)                    | 0.0%           |
| Type 2 diabetes incidence (E11)          | 0.71 (0.52, 0.97)                | 27.3%          | 0.74 (0.72, 0.77)                    | 0.0%           | 0.74 (0.72, 0.77)                    | 0.0%           |

*n/a - too few studies for a meta-analysis*

**Table S6. Meta-regressions: Association between study-level variables and CVD mortality relative risk for 11.25 METhours/week increase in physical activity, assuming .025 power transformation**

| <i>Study-level variables</i>                                  | <i>Meta-regression coefficient</i> | <i>p</i> |
|---------------------------------------------------------------|------------------------------------|----------|
| Quality score (minimum = 1; maximum = 8)                      | 0.07                               | 0.023    |
| Method of obesity measurement (0 = subjective; 1 = objective) | 0.24                               | 0.001    |
| Validated PA measurement (0 = no; 1 = yes)                    | 0.07                               | 0.342    |
| Gender (0 = men only; 1 = women only)                         | -0.03                              | 0.654    |
| Mean age of participants (0 = under 65; 1 = 65+)              | -0.09                              | 0.287    |
| Active travel (0 = not included; 1 = included)                | -0.07                              | 0.480    |
| Occupational PA (0 = not included; 1 = included)              | 0.06                               | 0.351    |
| Household PA (0 = not included; 1 = included)                 | -0.07                              | 0.330    |
| Mean follow-up years                                          | 0.01                               | 0.381    |
| Geography (baseline – US): Europe                             | 0.07                               | 0.000    |
| Geography (baseline – US): Other                              | 0.15                               | 0.000    |

*NB: CVD mortality selected as outcome as it has the most data lines (17 data lines from 14 studies) and considerable heterogeneity. Meta-regression weighted by the inverse of the standard error. Results are not mutually adjusted.*

## Supplemental Figures

### Figures S1-7: Meta-analysis of 11.25 METhr/week increase in physical activity for cardiovascular disease and diabetes health outcomes

Meta-analysis results are displayed for all the power 0.25 analyses, adjusted for body weight. Conditions are given in the figures.

#### S1: CVD incidence

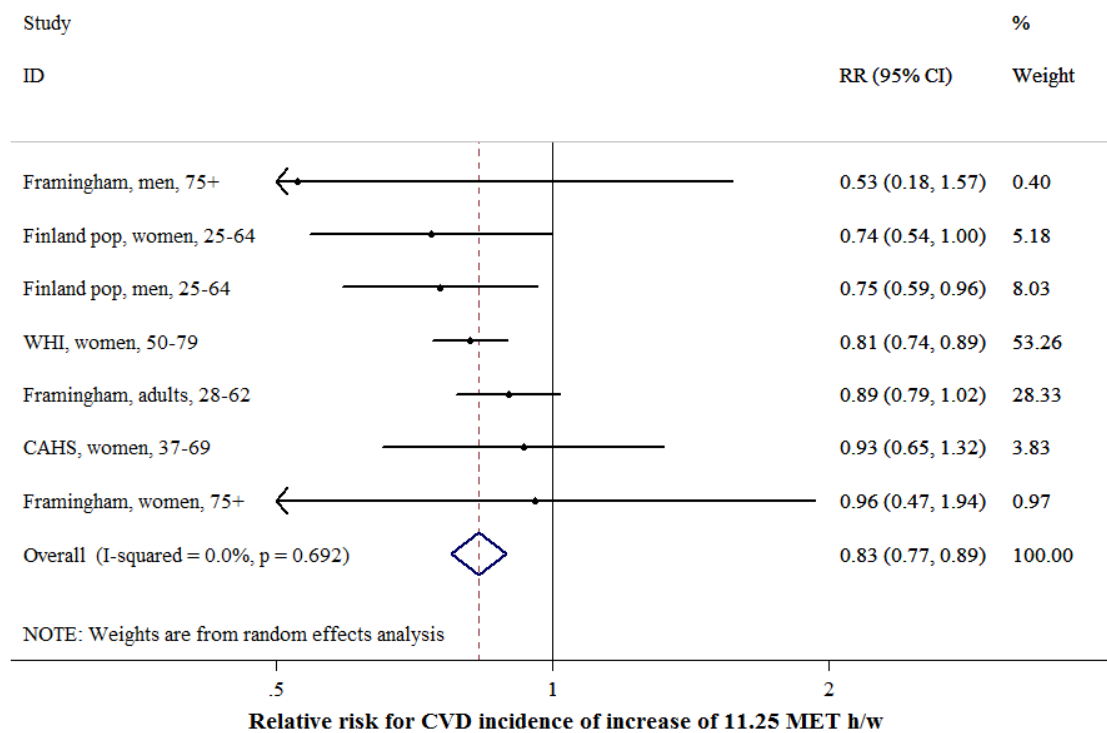

## S2: Stroke incidence

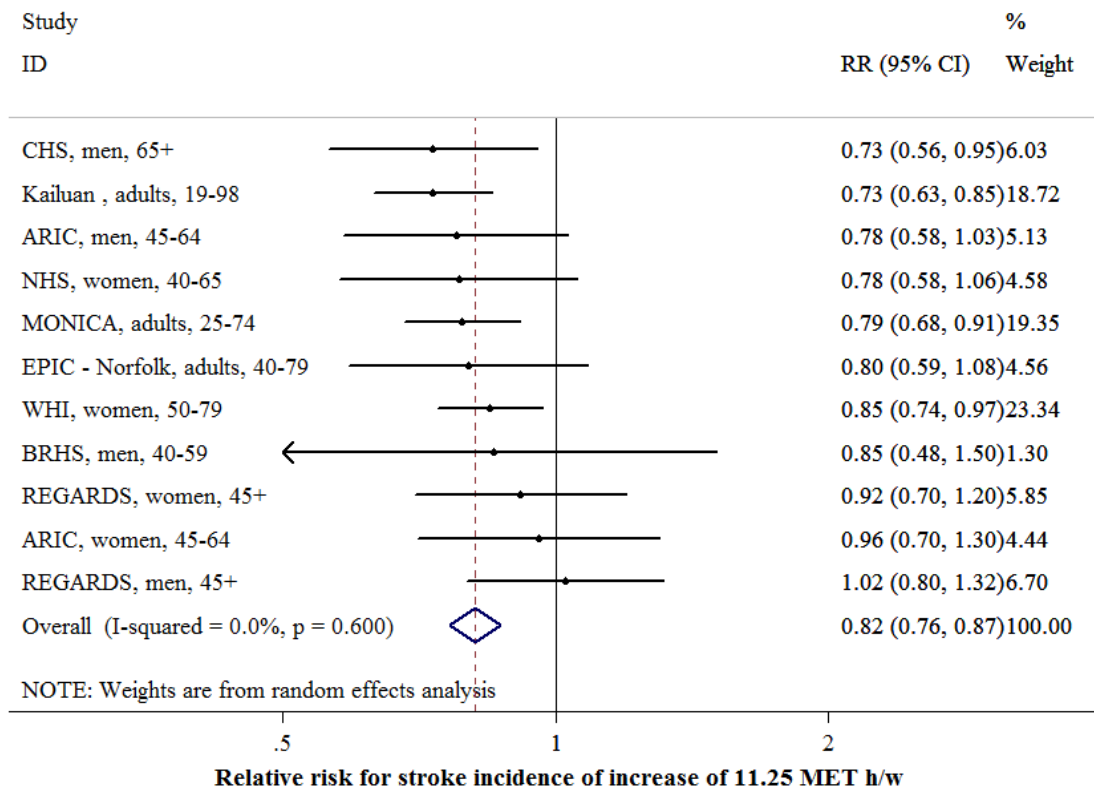



### S3: CHD incidence

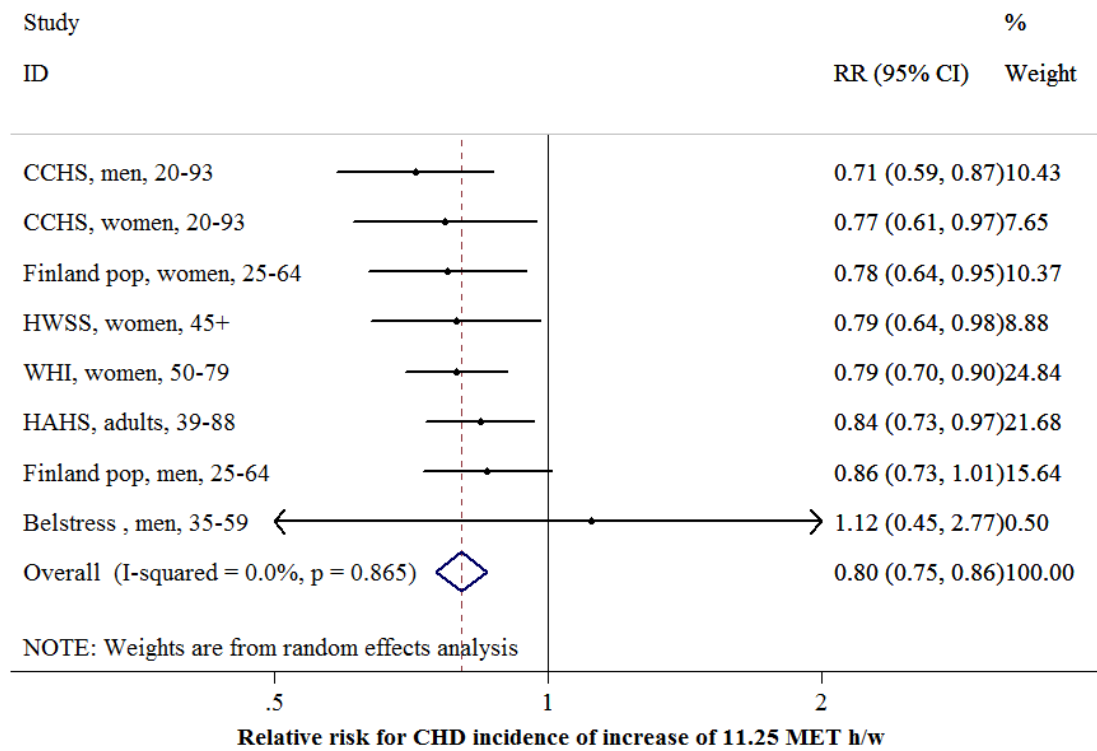

### S4: CHD mortality

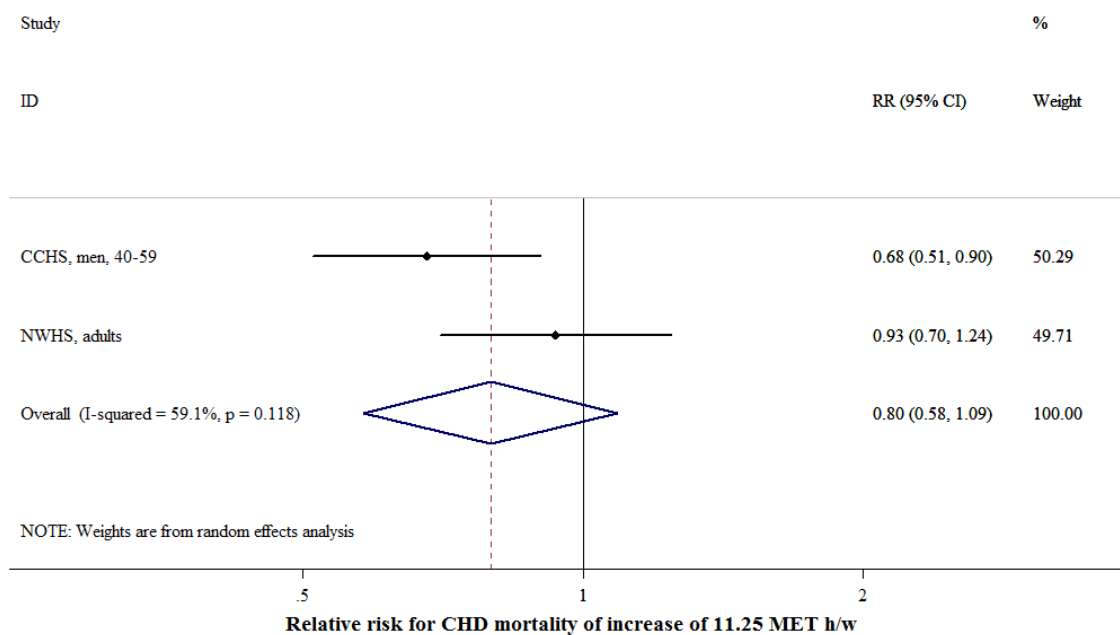

### S5: Heart failure incidence

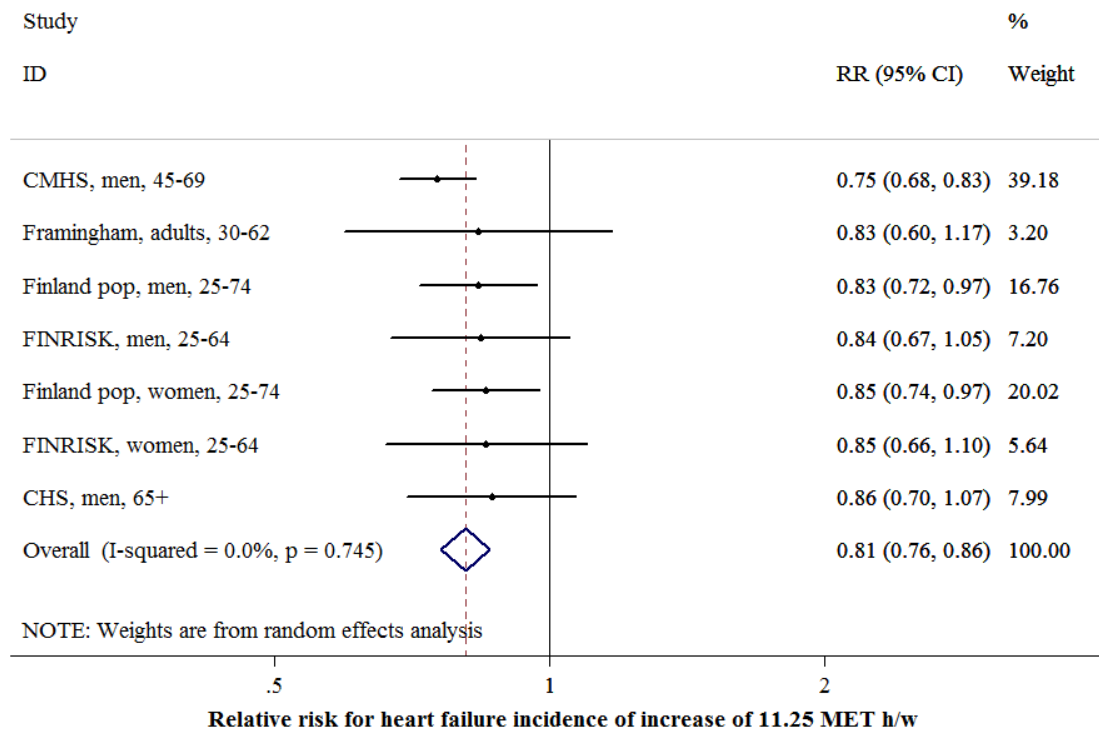

### S6: MI incidence

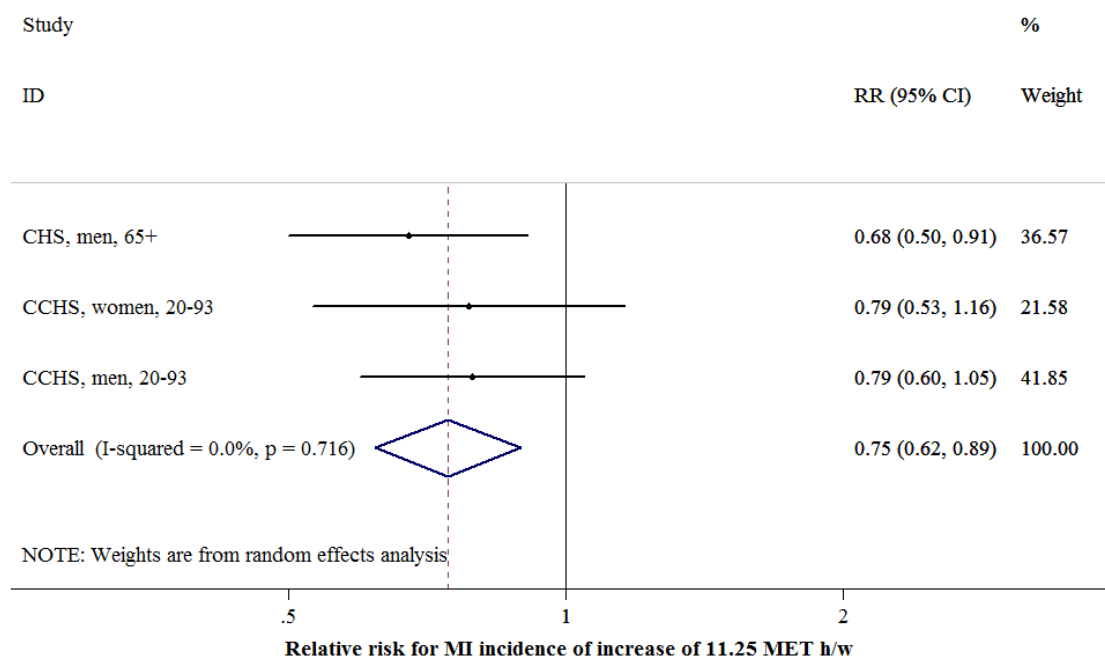

### S7: Diabetes incidence

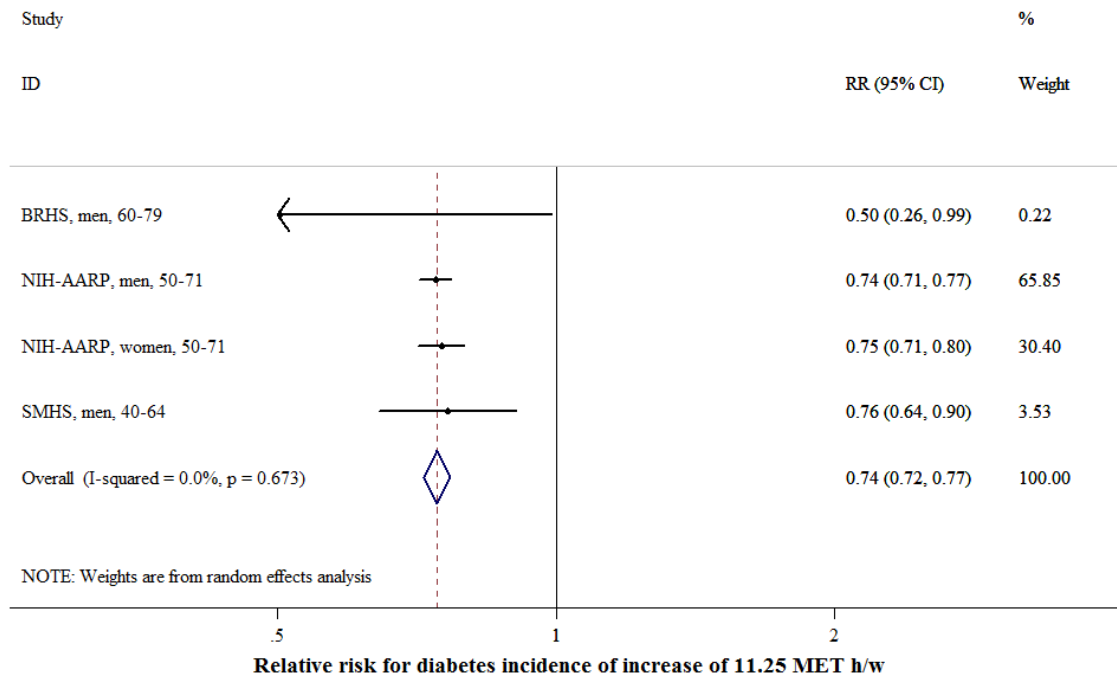

**Figures S8-S10: Dose-response relationship for the effect of 11.25 METhr/week increase in physical activity for the cardiovascular disease and diabetes health outcomes**

*Meta-analysis results are displayed for all the power 0.25 analyses, adjusted for body weight. Conditions are given in the figures.*

**Figure S8: CVD mortality**

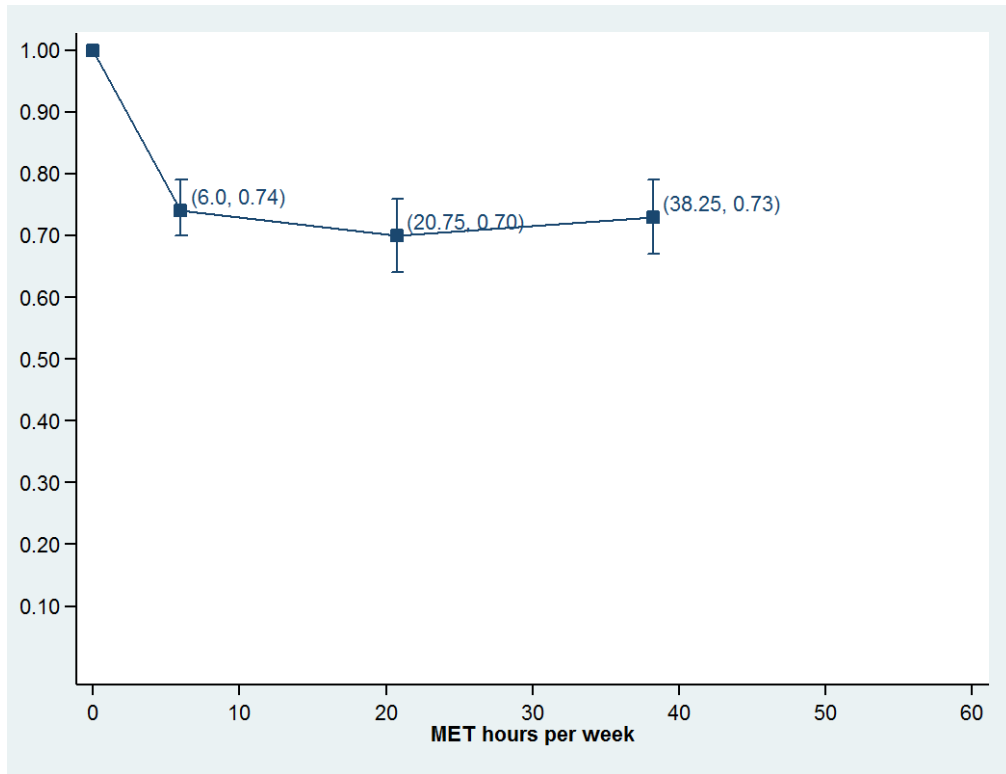

Figure S9: CVD incidence

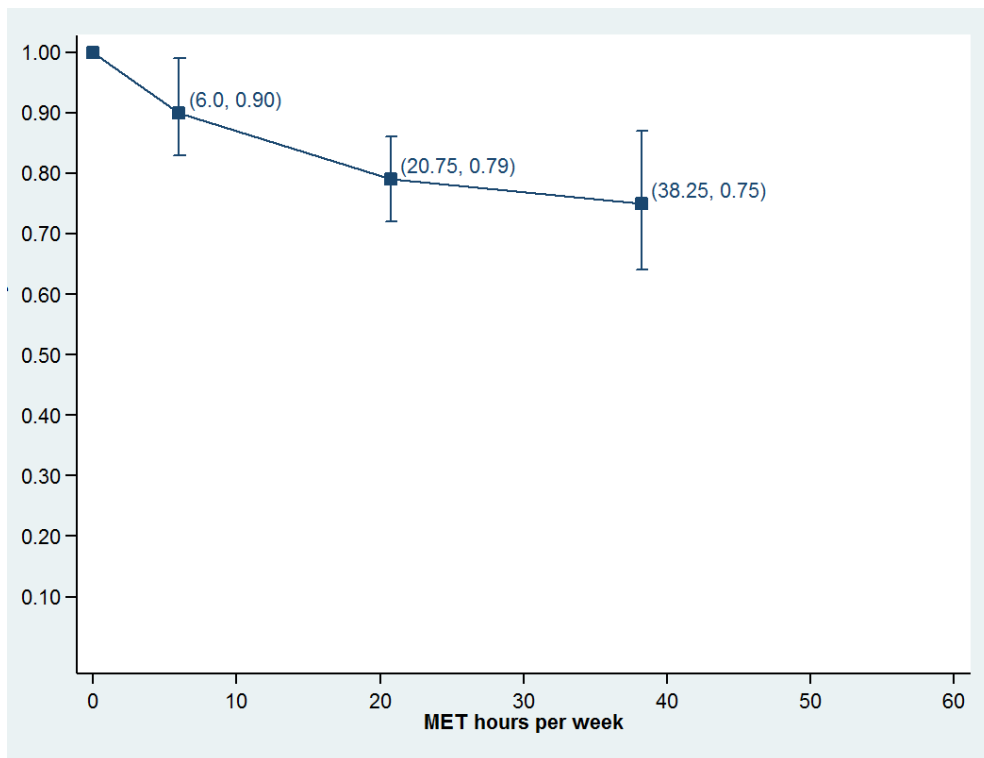

Figure S10: T2DM incidence

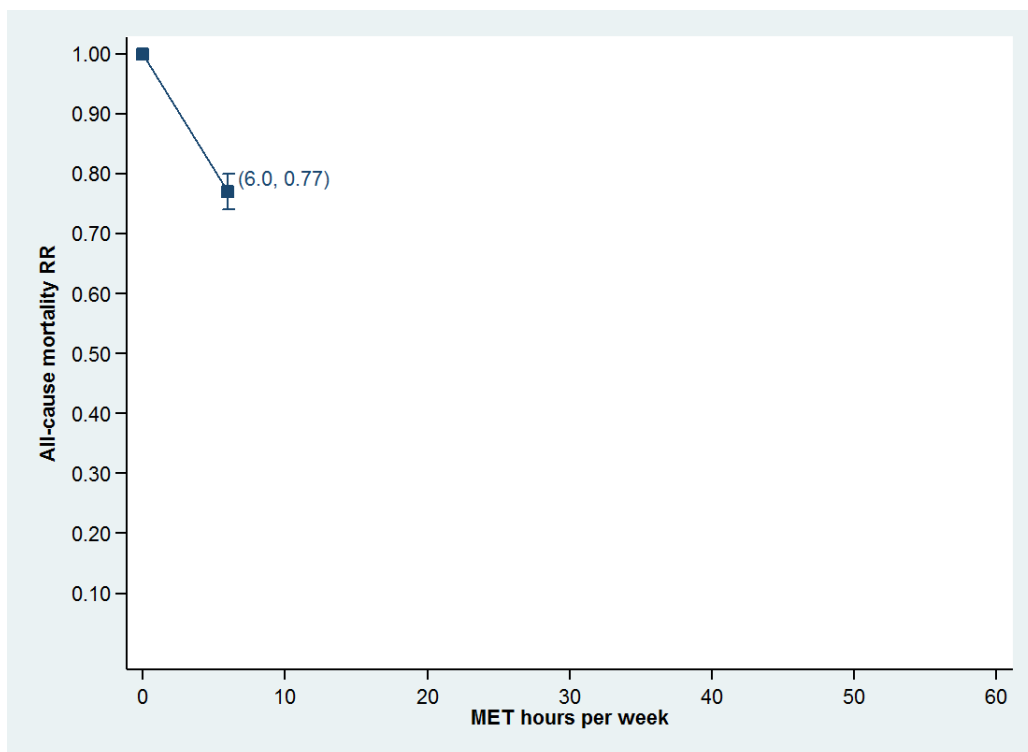

**Figure S11. Chart showing additional MET hours per week in highest exposure category for CVD mortality studies**

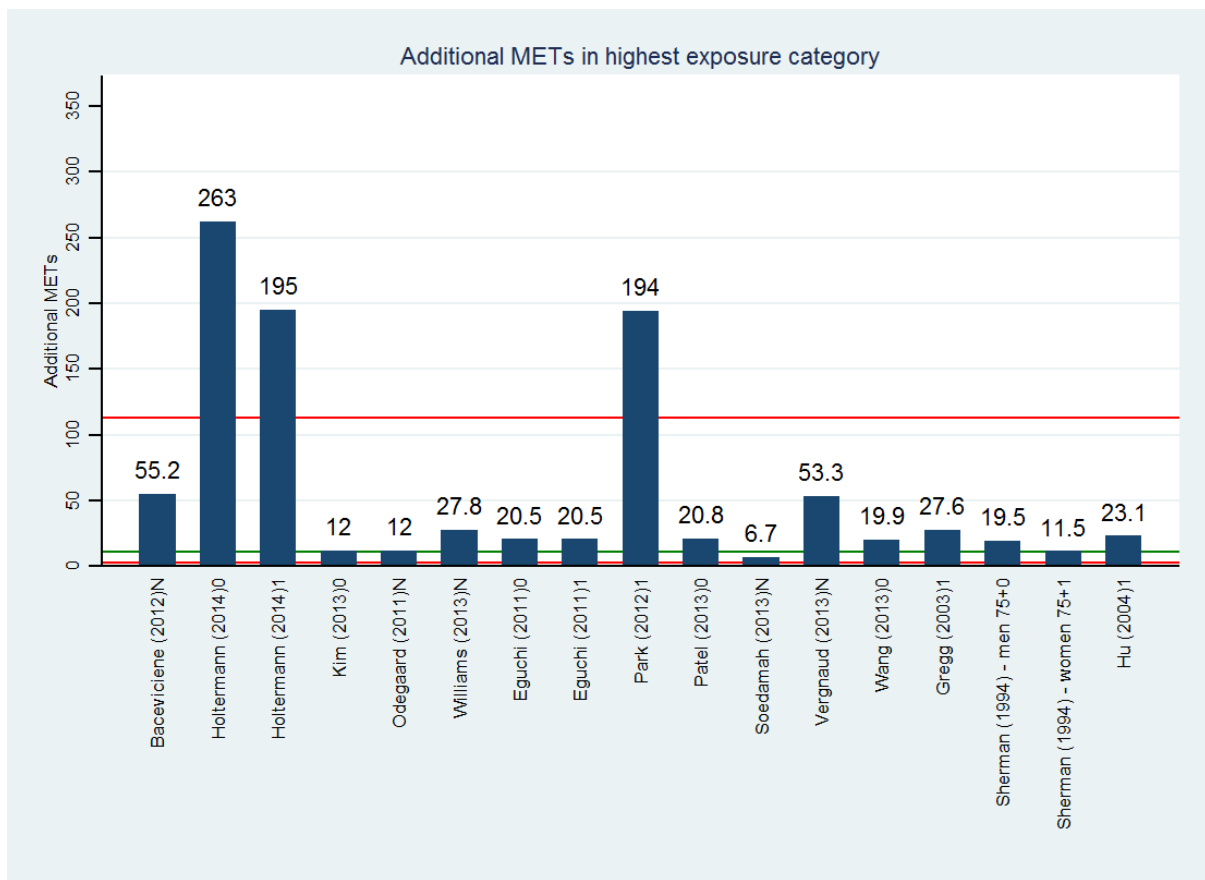

The green line indicates the recommended PA level of 11.25METhr/week

The red lines indicate the threshold for implausibly high levels (10 times the recommendation) or implausibly low (less than 30 minutes as demonstrated by the lower line)

**Figure S12. Chart showing additional METs of less than 30 in highest exposure category CVD mortality studies**

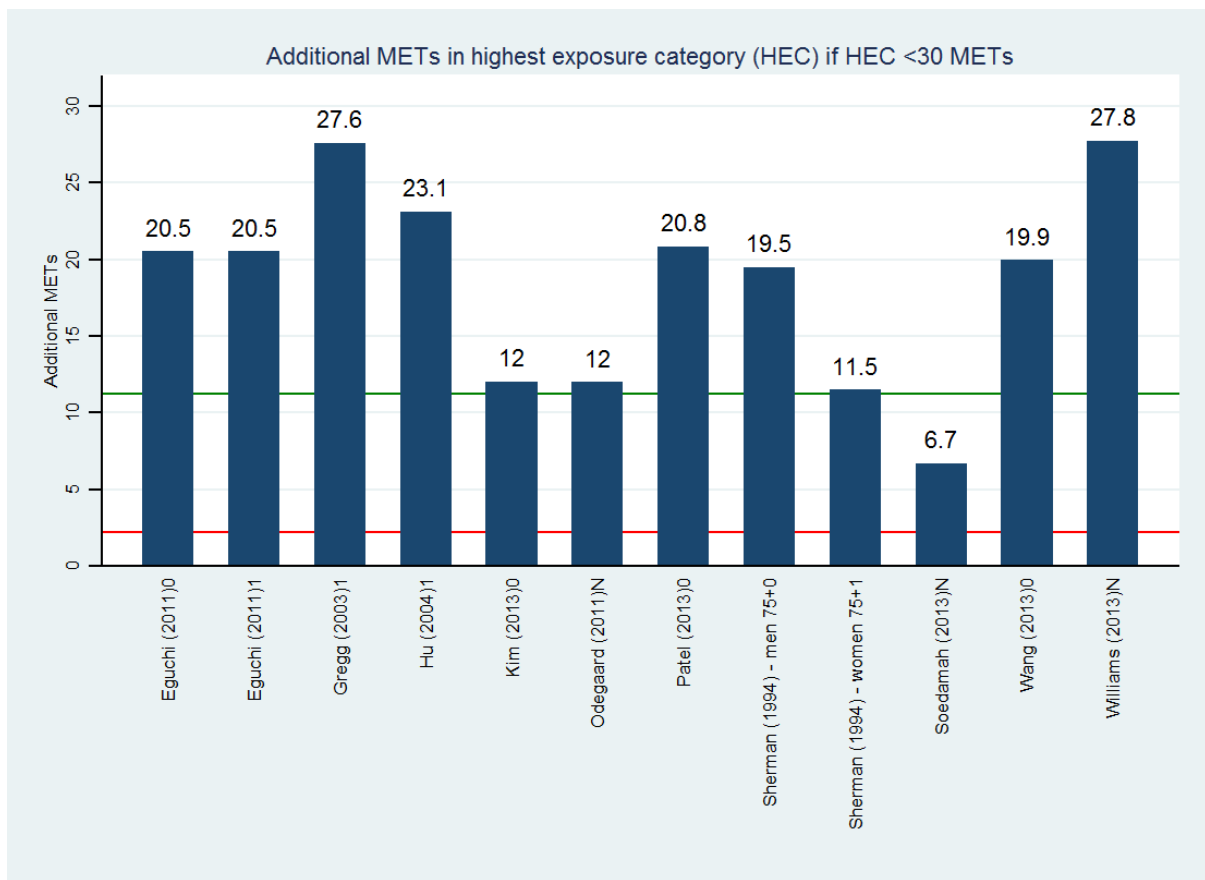

Please note the green line relates to recommended PA of 11.25METs, compared with the red line this time pertaining to the lower limit of <30 mins per week.

**Figure S13. Chart showing additional METs of less than 30 in highest exposure category for T2DM incidence studies**

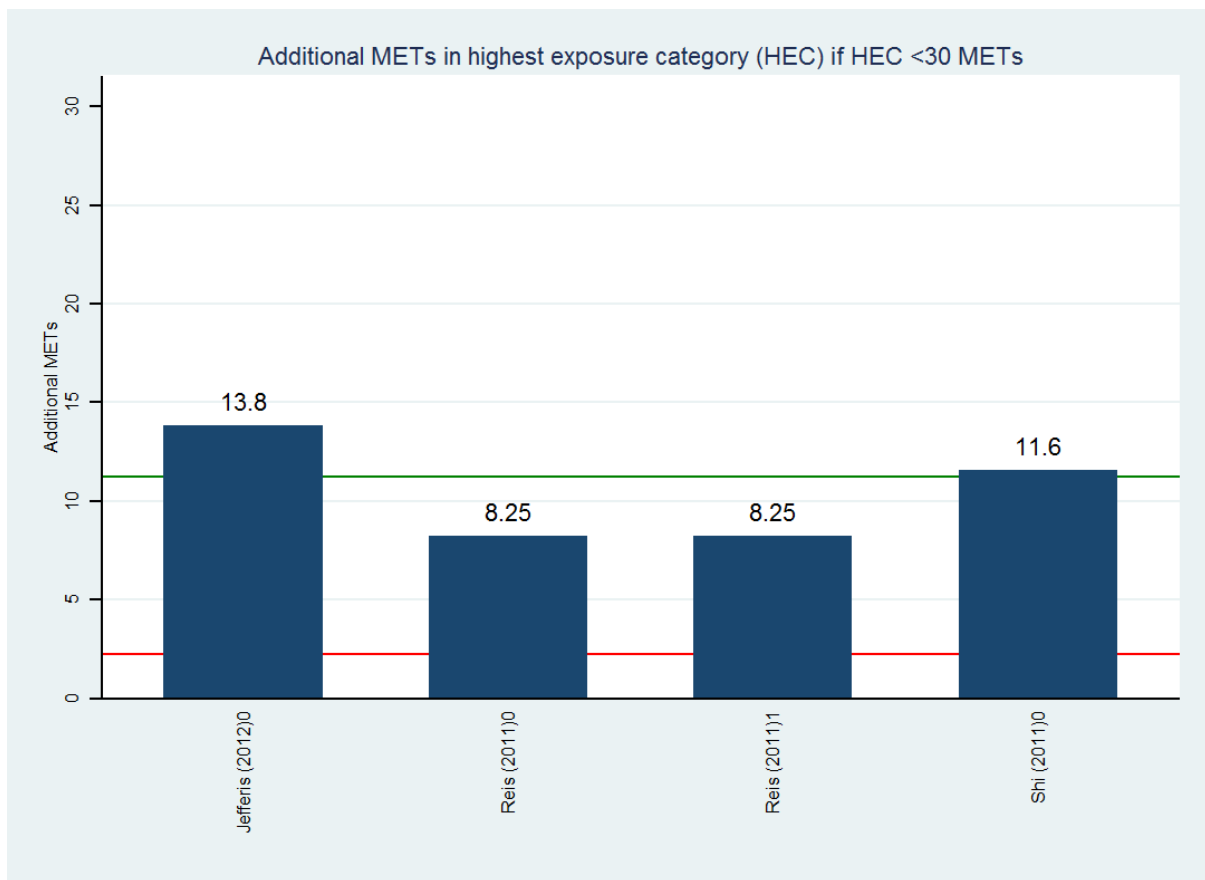

Please note the green line relates to recommended PA of 11.25METs, compared with the red line this time pertaining to the lower limit of <30 mins per week.



**Figures S14—S20: Funnel plots for meta-analyses of 11.25 METhr/week increase in physical activity for cardiovascular disease and diabetes health outcomes**

*Meta-analysis results are displayed for all the power 0.25 analyses, adjusted for body weight. Conditions are given in the figures.*

**S14: CVD incidence**

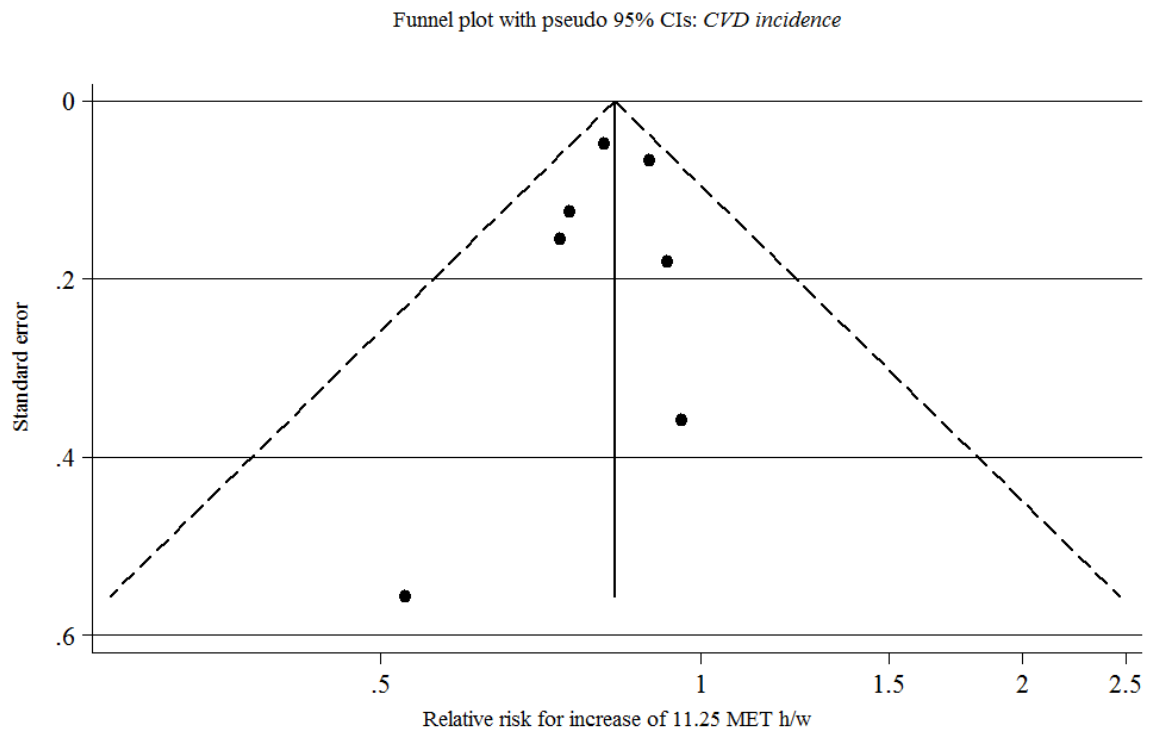

### S15: Stroke incidence

Funnel plot with pseudo 95% CIs: *stroke incidence*

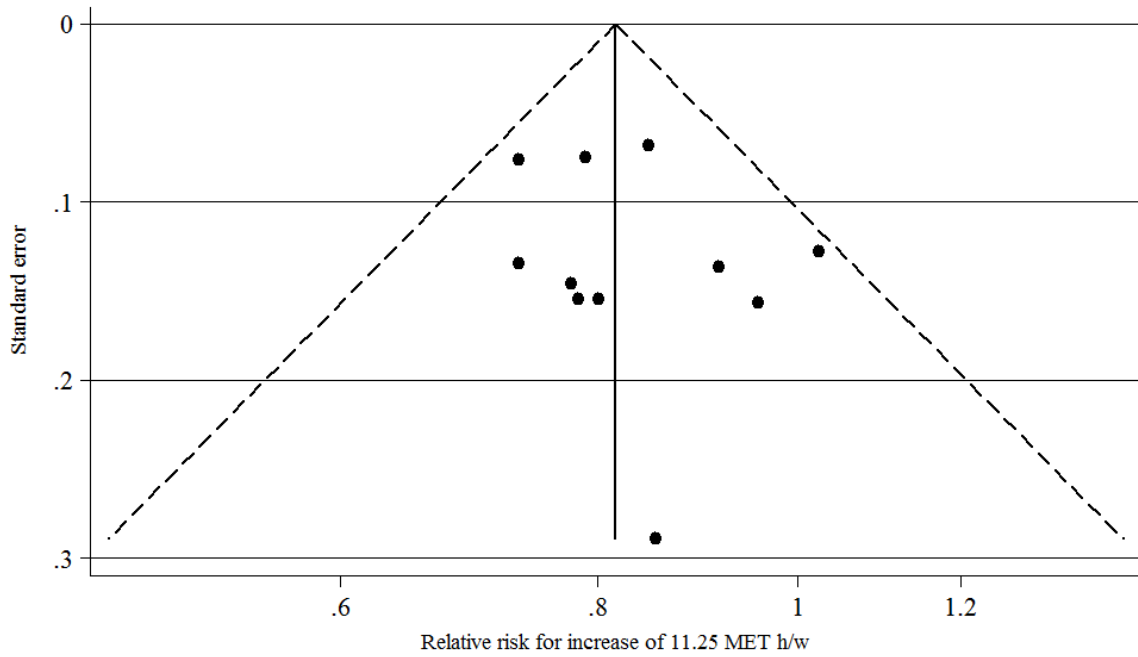

### S16: CHD incidence

Funnel plot with pseudo 95% CIs: *CHD incidence*

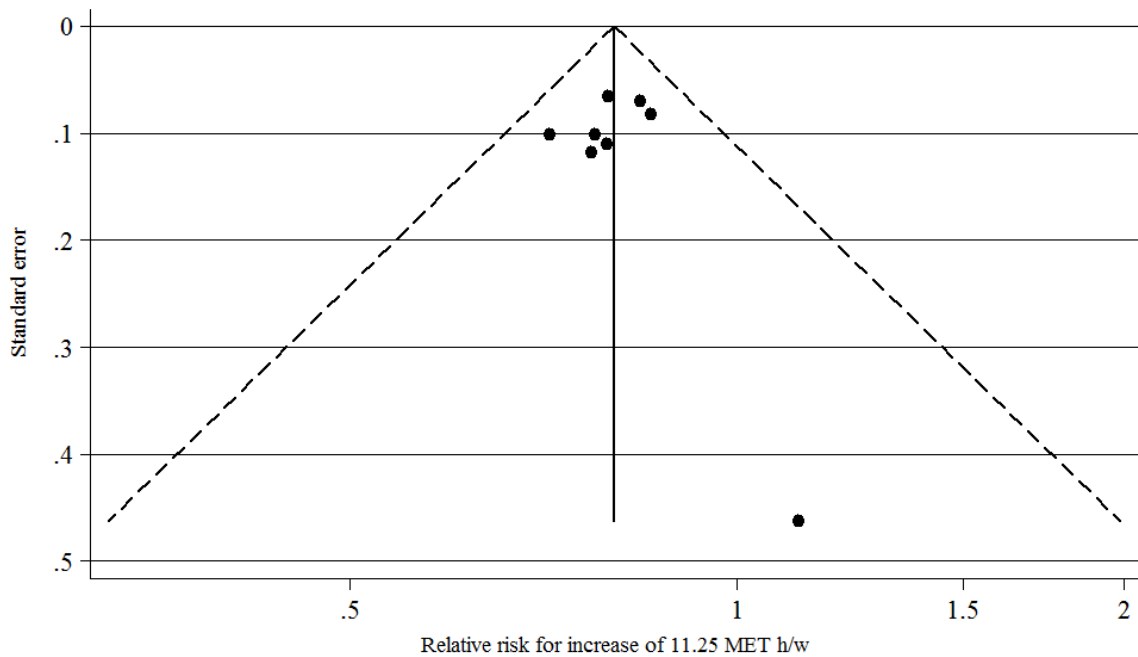

**S17: CHD mortality**

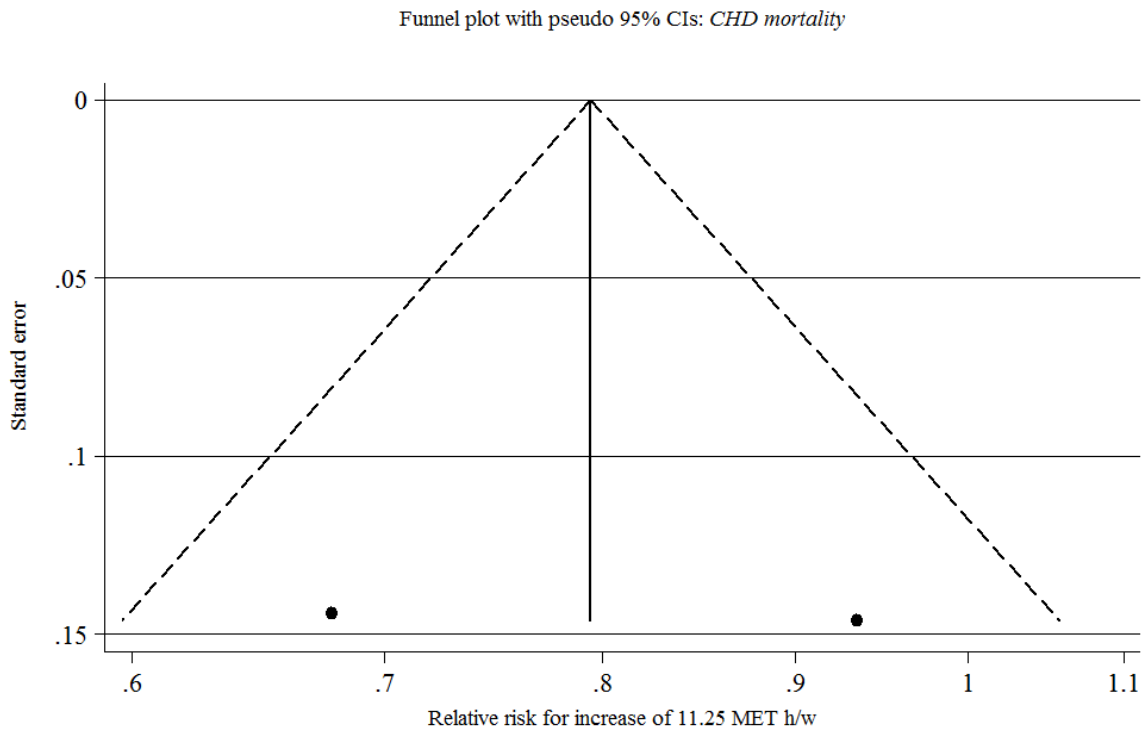

**S18: Heart failure incidence**

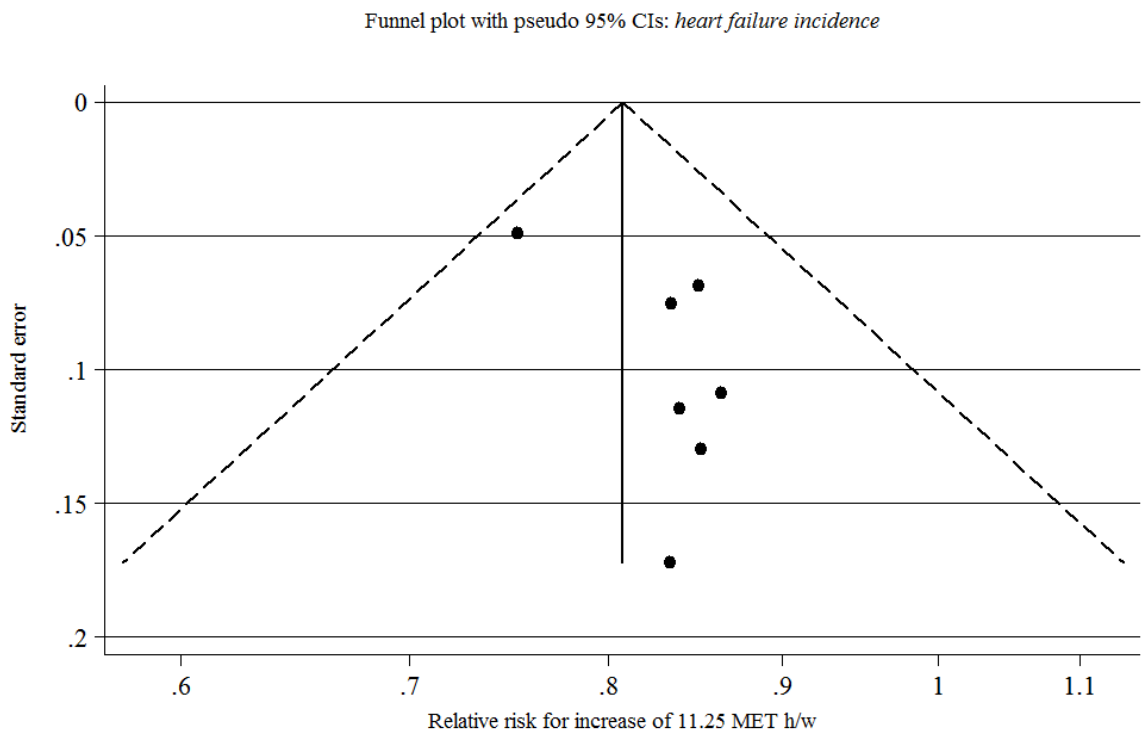

**S19: MI incidence**

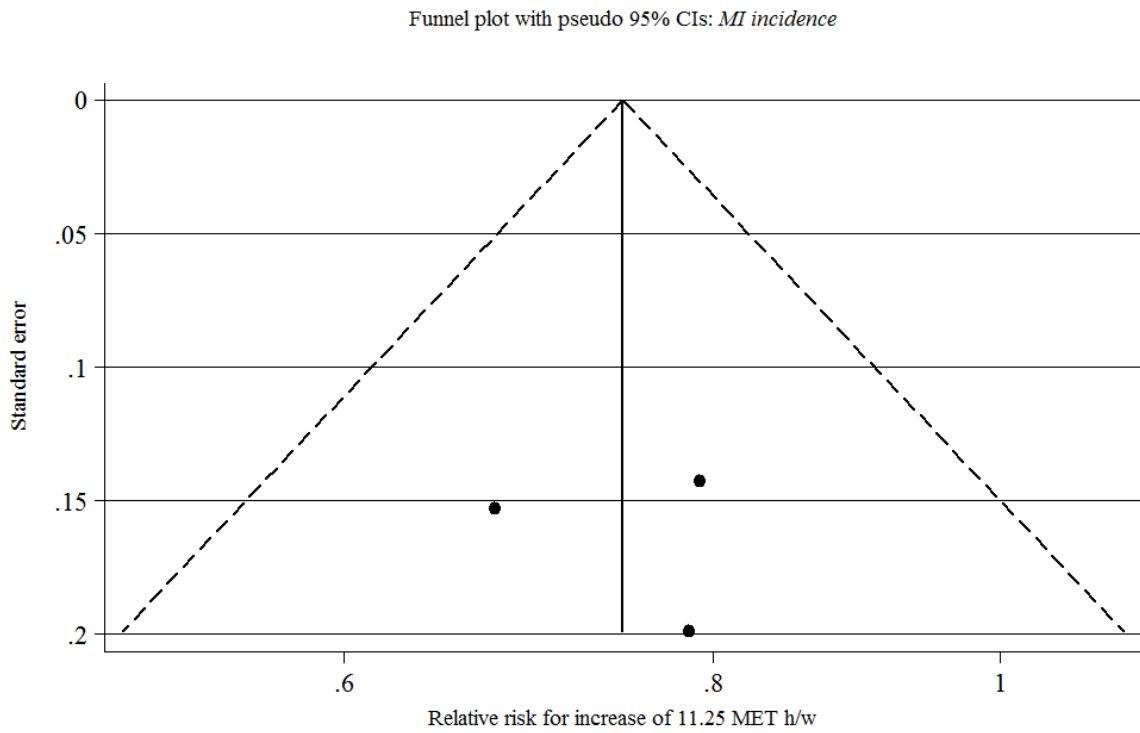

**S20: Diabetes incidence**

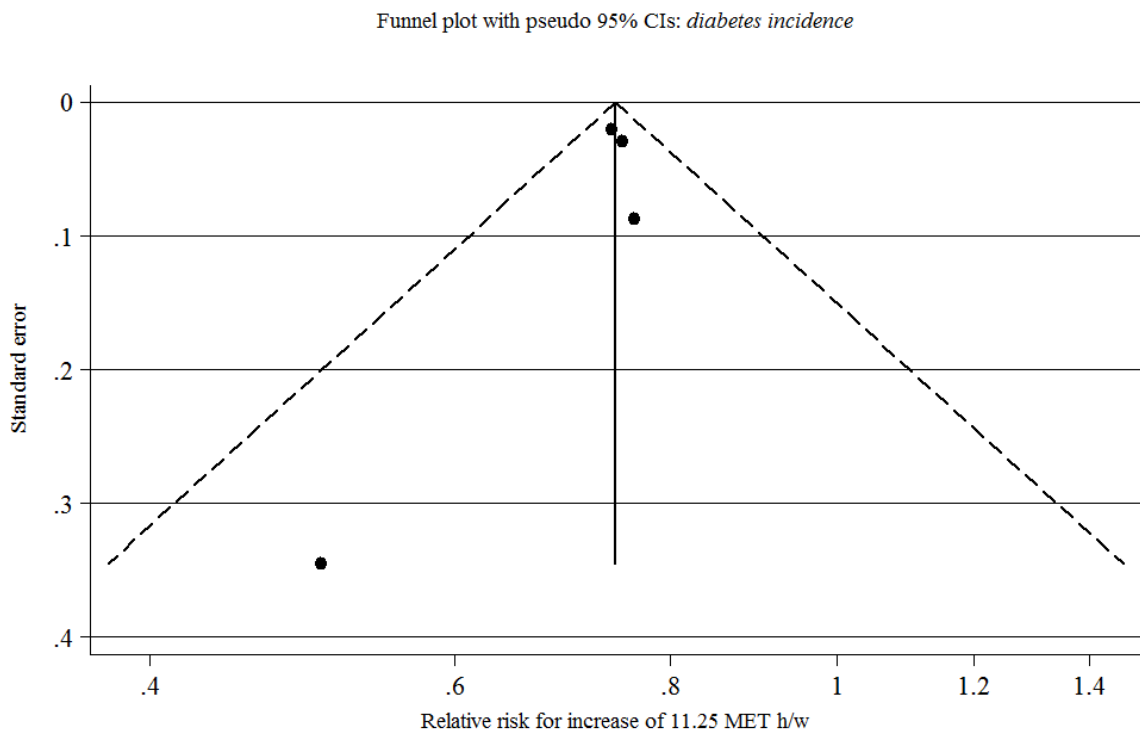

## References:

1. Sherman SE, D'Agostino RB, Cobb JL, Kannel WB. Does exercise reduce mortality rates in the elderly? Experience from the Framingham Heart Study. *Am Heart J.* 1994;128:965-72.
2. Sesso HD, Paffenbarger RS, Ha T, Lee IM. Physical activity and cardiovascular disease risk in middle-aged and older women. *Am J Epidemiol.* 1999;150:408-16.
3. Hu FB, Stampfer MJ, Colditz GA, Ascherio A, Rexrode KM, Willett WC, Manson JE. Physical activity and risk of stroke in women. *Jama.* 2000;283:2961-7.
4. Sesso HD, Paffenbarger RS, Jr., Lee IM. Physical activity and coronary heart disease in men: The Harvard Alumni Health Study. *Circulation.* 2000;102:975-80.
5. Gregg EW, Cauley JA, Stone K, Thompson TJ, Bauer DC, Cummings SR, Ensrud KE; Study of Osteoporotic Fractures Research Group. Relationship of changes in physical activity and mortality among older women. *Jama.* 2003;289:2379-86.
6. Hu FB, Willett WC, Li T, Stampfer MJ, Colditz GA, Manson JE. Adiposity as compared with physical activity in predicting mortality among women. *N Engl J Med.* 2004;351:2694-703.
7. Hu G, Tuomilehto J, Silventoinen K, Barengo N, Jousilahti P. Joint effects of physical activity, body mass index, waist circumference and waist-to-hip ratio with the risk of cardiovascular disease among middle-aged Finnish men and women. *Eur Heart J.* 2004;25:2212-9.
8. Franco OH, de Laet C, Peeters A, Jonker J, Mackenbach J, Nusselder W. Effects of physical activity on life expectancy with cardiovascular disease. *Arch Intern Med.* 2005;165:2355-60.
9. Myint PK, Luben RN, Wareham NJ, Welch AA, Bingham SA, Day NE, Khaw KT. Combined work and leisure physical activity and risk of stroke in men and women in the European prospective investigation into Cancer-Norfolk Prospective Population Study. *Neuroepidemiology.* 2006;27:122-9.
10. Hu G, Jousilahti P, Borodulin K, Barengo NC, Lakka TA, Nissinen A, Tuomilehto J. Occupational, commuting and leisure-time physical activity in relation to coronary heart disease among middle-aged Finnish men and women. *Atherosclerosis.* 2007;194:490-7.
11. Hu G, Jousilahti P, Antikainen R, Katzmarzyk PT, Tuomilehto J. Joint effects of physical activity, body mass index, waist circumference, and waist-to-hip ratio on the risk of heart failure. *Circulation.* 2010;121:237-44.
12. Eguchi E, Iso H, Tanabe N, Wada Y, Yatsuya H, Kikuchi S, Inaba Y, Tamakoshi A; Japan Collaborative Cohort Study Group. Healthy lifestyle behaviours and cardiovascular mortality among Japanese men and women: the Japan collaborative cohort study. *Eur Heart J.* 2012;33:467-77.

13. Odegaard AO, Koh WP, Gross MD, Yuan JM, Pereira MA. Combined lifestyle factors and cardiovascular disease mortality in Chinese men and women: the Singapore Chinese health study. *Circulation*. 2011;124:2847-54.
14. Petersen CB, Gronbaek M, Helge JW, Thygesen LC, Schnohr P, Tolstrup JS. Changes in physical activity in leisure time and the risk of myocardial infarction, ischemic heart disease, and all-cause mortality. *Eur J Epidemiol*. 2012;27:91-9.
15. Reis JP, Loria CM, Sorlie PD, Park Y, Hollenbeck A, Schatzkin A. Lifestyle factors and risk for new-onset diabetes: a population-based cohort study. *Annals of internal medicine*. 2011;155:292-9.
16. Williams PT. Dose-response relationship of physical activity to premature and total all-cause and cardiovascular disease mortality in walkers. *PloS one*. 2013;8:e78777.
17. Baceviciene M, Luksiene DI, Bernotiene G, Tamosiunas A. Estimation of all-cause and cardiovascular mortality risk in relation to leisure-time physical activity: a cohort study. *Medicina (Kaunas)*. 2012;48:632-9.
18. Clays E, Van Herck K, De Buyzere M, Kornitzer M, Kittel F, De Backer G, De Bacquer D. Behavioural and psychosocial correlates of nondipping blood pressure pattern among middle-aged men and women at work. *J Hum Hypertens*. 2012;26:381-7.
19. Holtermann A, Mortensen OS, Sogaard K, Gyntelberg F, Suadicani P. Risk factors for ischaemic heart disease mortality among men with different occupational physical demands. A 30-year prospective cohort study. *BMJ open*. 2012;2:e000279.
20. Jefferis BJ, Whincup PH, Lennon L, Wannamethee SG. Longitudinal associations between changes in physical activity and onset of type 2 diabetes in older British men: the influence of adiposity. *Diabetes Care*. 2012;35:1876-83.
21. Kraigher-Krainer E, Lyass A, Massaro JM, Lee DS, Ho JE, Levy D, Kannel WB, Vasan RS. Association of physical activity and heart failure with preserved vs. reduced ejection fraction in the elderly: the Framingham Heart Study. *Eur J Heart Fail*. 2013;15:742-6.
22. Park S, Lee J, Kang DY, Rhee CW, Park BJ. Indoor physical activity reduces all-cause and cardiovascular disease mortality among elderly women. *J Prev Med Public Health*. 2012;45:21-8.
23. Chomistek AK, Manson JE, Stefanick ML, Lu B, Sands-Lincoln M, Going SB, Garcia L, Allison MA, Sims ST, LaMonte MJ, Johnson KC, Eaton CB. Relationship of sedentary behavior and physical activity to incident cardiovascular disease: results from the Women's Health Initiative. *J Am Coll Cardiol*. 2013;61:2346-54.
24. Gunnell AS, Einarsdottir K, Galvao DA, Joyce S, Tomlin S, Graham V, McIntyre C, Newton RU, Briffa T. Lifestyle factors, medication use and risk for ischaemic heart disease hospitalisation: a longitudinal population-based study. *PloS one*. 2013;8:e77833.

25. Holtermann A, Marott JL, Gyntelberg F, Sogaard K, Suadicani P, Mortensen OS, Prescott E, Schnohr P. Does the benefit on survival from leisure time physical activity depend on physical activity at work? A prospective cohort study. *PloS one*. 2013;8:e54548.
26. Jefferis BJ, Whincup PH, Papacosta O, Wannamethee SG. Protective effect of time spent walking on risk of stroke in older men. *Stroke*. 2014;45:194-9.
27. Kim JY, Ko YJ, Rhee CW, Park BJ, Kim DH, Bae JM, Shin MH, Lee MS, Li ZM, Ahn YO. Cardiovascular health metrics and all-cause and cardiovascular disease mortality among middle-aged men in Korea: the Seoul male cohort study. *J Prev Med Public Health*. 2013;46:319-28.
28. McDonnell MN, Hillier SL, Hooker SP, Le A, Judd SE, Howard VJ. Physical activity frequency and risk of incident stroke in a national US study of blacks and whites. *Stroke*. 2013;44:2519-24.
29. Patel K, Sui X, Zhang Y, Fonarow GC, Aban IB, Brown CJ, Bittner V, Kitzman DW, Allman RM, Banach M, Aronow WS, Anker SD, Blair SN, Ahmed A. Prevention of heart failure in older adults may require higher levels of physical activity than needed for other cardiovascular events. *Int J Cardiol*. 2013;168:1905-9.
30. Soedamah-Muthu SS, De Neve M, Shelton NJ, Tielemans SM, Stamatakis E. Joint associations of alcohol consumption and physical activity with all-cause and cardiovascular mortality. *Am J Cardiol*. 2013;112:380-6.
31. Vergnaud AC, Romaguera D, Peeters PH, van Gils CH, Chan DS, Romieu I, Freisling H, Ferrari P, Clavel-Chapelon F, Fagherazzi G, Dartois L, Li K, Tikk K, Bergmann MM, Boeing H, Tjønneland A, Olsen A, Overvad K, Dahm CC, Redondo ML, Agudo A, Sánchez MJ, Amiano P, Chirlaque MD, Ardanaz E, Khaw KT, Wareham NJ, Crowe F, Trichopoulou A, Orfanos P, Trichopoulos D, Masala G, Sieri S, Tumino R, Vineis P, Panico S, Bueno-de-Mesquita HB, Ros MM, May A, Wirfält E, Sonestedt E, Johansson I, Hallmans G, Lund E, Weiderpass E, Parr CL, Riboli E, Norat T. Adherence to the World Cancer Research Fund/American Institute for Cancer Research guidelines and risk of death in Europe: results from the European Prospective Investigation into Nutrition and Cancer cohort study<sup>1,4</sup>. *Am J Clin Nutr*. 2013;97:1107-20.
32. Wang N, Zhang X, Xiang YB, Li H, Yang G, Gao J, Zheng W, Shu XO. Associations of Tai Chi, walking, and jogging with mortality in Chinese men. *Am J Epidemiol*. 2013;178:791-6.
33. Young DR, Reynolds K, Sidell M, Brar S, Ghai NR, Sternfeld B, Jacobsen SJ, Slezak JM, Caan B, Quinn VP. Effects of physical activity and sedentary time on the risk of heart failure. *Circ Heart Fail*. 2014;7:21-7.
34. Ainsworth BE, Haskell WL, Herrmann SD, Meckes N, Bassett DR, Jr., Tudor-Locke C, Greer JL, Vezina J, Whitt-Glover MC, Leon AS. 2011 Compendium of Physical Activities: a second update of codes and MET values. *Med Sci Sports Exerc*. 2011;43:1575-81.

35. Jefferis BJ, Whincup PH, Welsh P, Wannamethee SG, Rumley A, Ebrahim S, Lawlor DA, Lowe GD. Prospective study of IL-18 and risk of MI and stroke in men and women aged 60-79 years: a nested case-control study. *Cytokine*. 2013;61:513-20.
36. Shi L, Shu XO, Li H, Cai H, Liu Q, Zheng W, Xiang YB, Villegas R. Physical activity, smoking, and alcohol consumption in association with incidence of type 2 diabetes among middle-aged and elderly Chinese men. *PloS one*. 2013;8:e77919.
37. Zhang Y, Tuomilehto J, Jousilahti P, Wang Y, Antikainen R, Hu G. Lifestyle factors on the risks of ischemic and hemorrhagic stroke. *Arch Intern Med*. 2011;171:1811-8.
38. Wattanakit K, Lutsey PL, Bell EJ, Gornik H, Cushman M, Heckbert SR, Rosamond WD, Folsom AR. Association between cardiovascular disease risk factors and occurrence of venous thromboembolism. A time-dependent analysis. *J Thromb Haemost*. 2012;108:508-15.
